RESEARCH ARTICLE

# Prevalence and factors associated with hyperglycemia among children living with HIV on dolutegravir in Kabale district, southwestern Uganda

Liban Hussein Idow<sup>1\*</sup>, Timothy Nduhukire<sup>1</sup>, Siyadora Ankunda<sup>1,2</sup>, Sam Tumwesigire<sup>1</sup>, Filbert Nyeko<sup>3</sup>, James K. Tumwine<sup>1</sup>

**1** Department of Paediatrics and Child Health, Kabale University School of Medicine, Kabale, Uganda, **2** Paediatric Haemato-Oncology, Mbarara Regional Referral Hospital, Mbarara, Uganda, **3** Kabale Regional Referral Hospital, Kabale, Uganda

\* [lidow.hussein@gmail.com](mailto:lidow.hussein@gmail.com)

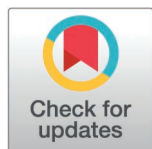

## Abstract

### Background

Undiagnosed and poorly managed high blood sugar levels can result in short- and long-term complications in children. Following worldwide introduction of dolutegravir based antiretroviral treatment in 2018, several studies in adult people living with HIV have reported high prevalence of hyperglycemia. Little is known about hyperglycemia in children living with HIV on dolutegravir treatment combinations in Uganda.

### Objectives

To determine the prevalence and factors associated with hyperglycemia in children living with HIV on dolutegravir in Kabale district, southwestern Uganda.

### Methods

In a cross-sectional study, 271 HIV infected children on dolutegravir (DTG) were recruited using proportional to size and simple random sampling methods from 18 health facilities that provide Anti-retroviral therapy (ART) services in Kabale district. HIV infected children aged below 18 years were considered eligible to participate in the study. Data was collected using structured questionnaires. Blood samples were taken for random blood sugar and HbA1C. Data was analyzed using STATA 17.0 for both descriptive and inferential statistics. Logistic regression analysis was done, crude and adjusted odds ratios obtained.

## OPEN ACCESS

**Citation:** Idow LH, Nduhukire T, Ankunda S, Tumwesigire S, Nyeko F, Tumwine JK (2025) Prevalence and factors associated with hyperglycemia among children living with HIV on dolutegravir in Kabale district, southwestern Uganda. PLoS One 20(12): e0339268. <https://doi.org/10.1371/journal.pone.0339268>

**Editor:** Otávio Augusto Chaves, University of Coimbra: Universidade de Coimbra, PORTUGAL

**Received:** June 30, 2025

**Accepted:** December 2, 2025

**Published:** December 16, 2025

**Copyright:** © 2025 Idow et al. This is an open access article distributed under the terms of the [Creative Commons Attribution License](https://creativecommons.org/licenses/by/4.0/), which permits unrestricted use, distribution, and reproduction in any medium, provided the original author and source are credited.

**Data availability statement:** All relevant data are within the manuscript.

**Funding:** The author(s) received no specific funding for this work.

**Competing interests:** The authors have declared that no competing interests exist.

## Results

The prevalence of hyperglycemia was 20.3% (95% CI: 15.9–25.5): Of the children with hyperglycemia, 76% (42/55) had prediabetes and 24% (13/55) had diabetes mellitus.

Red meat consumption (AOR:3.52; 95% CI: 1.4–9.0,  $p=0.009$ ) and being above 13 years of age (AOR:2.61; 95% CI 1.4–4.87,  $p=0.003$ ) were independently associated with hyperglycemia.

## Conclusion

One in every five children with HIV on DTG had hyperglycemia. Among those with hyperglycemia, 24% had diabetes mellitus. Hyperglycemia was more likely to be present in adolescents and those who consumed red meat. Regular monitoring of blood sugar in children living with HIV on DTG is recommended.

## Introduction

Human Immunodeficiency Virus (HIV) is a chronic infection affecting about 1.4 million children worldwide. Of these, more than 80% are in sub-Saharan Africa [1]. In accordance with the World Health Organization recommendation of 2018, the Ministry of Health of Uganda introduced dolutegravir based antiretroviral drugs as treatment of choice for people living with HIV including children [2].

Dolutegravir (DTG) is a 2<sup>nd</sup> generation HIV integrase inhibitor, which has revolutionised HIV care [3]. However, several studies mainly in adults have reported new onset hyperglycemia among HIV infected patients following the initiation on DTG [4]. In a study by Gizamba [5], in South Africa, the prevalence of hyperglycemia among HIV infected patients started on DTG was 6.1%. In Uganda, a study involving adult patients living with HIV on dolutegravir in an urban setting reported a 12.8% prevalence of hyperglycemia [6].

Predictors of hyperglycemia among adults living with HIV on dolutegravir include, age, family history of diabetes, obesity, and other comorbidities such as hypertension [6,7].

In Uganda, routine blood sugar monitoring is mainly considered among adults living with HIV on DTG, but is not done for children [8]. There is limited information about the burden and factors associated with hyperglycemia among HIV infected children on dolutegravir. Therefore, we studied the prevalence and factors associated with hyperglycemia in children living with HIV on dolutegravir in Kabale district, southwestern Uganda.

## Materials and methods

### Study design

An analytical cross-sectional study was done to determine the prevalence and factors associated with hyperglycemia among HIV infected children on dolutegravir based

anti-retroviral treatment at health facilities in Kabale district, southwest Uganda. The study was conducted from 28<sup>th</sup> March to 25<sup>th</sup> May, 2025.

### Study setting

Kabale is one of the districts in southwestern Uganda. It is located approximately 410 kilometers from the capital city Kampala, and hosts Kabale Regional Referral Hospital, which is also the main teaching hospital for Kabale University School of Medicine (KABSOM). The study was done at 18 health facilities; three hospitals and 15 lower health facilities including, health center IIIs and IVs, that provide HIV prevention and treatment services in Kabale district.

### Study population

Children aged < 18 years with HIV infection on dolutegravir based treatment were included in the study. The caregivers of the children aged < 8 years gave written informed consent and those ≥ 8 years to less than 18 years, in addition to the caregivers'/ guardians' written informed consent, they also provided assent to participate in the study. HIV infected children who were diagnosed with hyperglycemia or diabetes mellitus before being initiated on dolutegravir based treatment were excluded.

### Sample size determination

The sample size for the prevalence of hyperglycemia was calculated using Kish Leslie formula [9] as shown:  $(N = \frac{z^2(1-P)P}{d^2})$ ; with 20% prevalence from a preprint study in Uganda [10]. The calculated sample size with 95% confidence interval, and 5% precision was 246. Correcting for 10% nonresponse, the final sample size to determine the prevalence of hyperglycemia among HIV infected children was 271.

The sample size for factors associated with hyperglycemia was calculated using Fleiss formula [11] in OpenEpi [12], considering duration on anti-retroviral treatment as an independent factor with an odds ratio of 7.0; 80% power, and 95% confidence interval. The calculated sample size for associated factors, with 10% nonresponse, was 163. This was smaller than the sample size of 271 for the prevalence. Therefore, the sample size of 271 was taken for the study.

### Sampling procedures

There were 441 children living with HIV on dolutegravir receiving care at 18 health facilities in Kabale district. Using proportional to size sampling method, we recruited 271 (61.45%) of the 441 children. Simple random sampling was then used to enroll the study participants from each health facility. At each health facility, the eligible participants were identified and assigned with unique numbers. Then, these were written on identical slips which were folded and put into a box. Thereafter, the slips were mixed thoroughly and randomly picked until the required sample was achieved.

### Study variables

The dependent variable in this study was hyperglycemia. The diagnosis of hyperglycemia was based on a random blood sugar of ≥ 7.8 mmol/L or HbA1C of ≥ 5.7% [13].

The independent variables were sociodemographic factors including child's age in years, sex, education status and caregiver factors such as relationships to the child, maternal HIV and paternal HIV status. Child medical factors included duration of dolutegravir based treatment, viral suppression status, HIV AIDS stage, and adherence. In addition, child's dietary factors were assessed using 24-hour dietary recall.

### Data collection procedures

Interviewer administered questionnaires were used for data collection. The data was collected by the principal investigator with the help of trained research assistants including a nurse/ counselor and laboratory technician from each health facility.

A venous blood sample was drawn from each study participant for random blood sugar and HbA1C. Oncall plus glucometer (manufactured by Acon laboratories, San Diego, USA) was used to determine the random blood glucose levels and whole blood samples were tested for HbA1C percentage using Getein 1100 Immunofluorescence quantitative analyzer machine (manufactured by Getein Biotech incorporated, Nanjing, China) at the Rugarama Hospital laboratory. The random blood sugar tests were run immediately while blood samples for the HbA1C were tested within 6 hours of collection. Within 24 hours of blood sample collection, every 30<sup>th</sup> blood sample was taken to the Lancet Clinical Laboratory (accredited laboratory by KENAS with ML/122, ISO 15189:2012) in Mbarara, Uganda, for quality control of the HbA1C results.

### Data management and statistical analysis

The data collection tools were coded with serial numbers for identification and tracking. Data entry was done using Microsoft excel 2021 for cleaning and storage. A clean dataset was imported into STATA version 17.0 for analysis. Descriptive and inferential analysis were performed. Frequency tables and proportions were summarized with categorical variables. The data was described using means and standard deviations for continuous normally distributed data; and medians with interquartile ranges for skewed data. The prevalence of hyperglycemia was calculated as a percentage of children living with HIV on DTG based therapy who had hyperglycemia. At bivariable level, the Chi-square test was used for categorized data to determine the factors associated with hyperglycemia. Fisher's exact test was used for variables with counts less than 5 in any cell of the tables. Factors with a  $p$  value  $\leq 0.2$  were taken for multivariable analysis. Multivariable analysis identified factors independently associated with hyperglycemia among HIV infected children using adjusted odds ratios, and 95% confidence intervals; and  $p < 0.05$ .

### Ethical considerations

Ethical clearance was obtained from Kabale University Research Ethics Committee (KABREC): reference number KABREC-2025–814. We obtained administrative clearance from Kabale district health office and Kabale Regional Referral Hospital (KRRH). Written informed consent was obtained from the caregivers of children aged below 8 years and informed consent from caregivers and assent from the children aged 8 years and above. The results were shared with the caregivers and patients as well the clinical team for patient care.

## Results

### Baseline characteristics of the study participants

In this study, 271 children living with HIV on dolutegravir based anti-retroviral treatment at 18 health facilities in Kabale district were recruited. The median age of the children was 13 years (IQR:9,15) and 50.55% were female. The median duration of treatment with DTG based regimen was 46 months (IQR: 26, 50). More than half of the children were from urban residences ([Table 1](#)).

### Prevalence of hyperglycemia among HIV infected children on dolutegravir in Kabale District

The prevalence of hyperglycemia among HIV infected children on DTG in Kabale district was 20.3% (55/271), 95% CI:15.9–25.5. Of these, 76% (42/55) had prediabetes and 24% (13/55) had diabetes mellitus.

Of the cases with hyperglycemia, 6.64% (18/271), 95% CI: 4–10, had abnormal random blood sugar (RBS) results. However, all the cases with hyperglycemia (55/271) were diagnosed using HbA1c including those with elevated RBS.

### Factors associated with hyperglycemia in the bivariable analysis

[Table 2](#) shows results of bivariable analysis. Children above 13 years of age (OR: 2.65), residing in urban settings (OR: 1.85), and those who had red meat in their last 24 hours (OR: 3.8) were likely to be hyperglycemic. Caregivers' occupation

**Table 1. Sociodemographic characteristics of HIV infected children on DTG in Kabale district.**

| Variable                            | Total N=271<br>n |     | Percentage |
|-------------------------------------|------------------|-----|------------|
| Age(years)                          | 0-5              | 29  | 10.70      |
|                                     | 6-11             | 78  | 28.78      |
|                                     | 12-17            | 164 | 60.52      |
| Gender                              | Male             | 134 | 49.45      |
|                                     | Female           | 137 | 50.55      |
| Education                           | ≤Primary         | 223 | 82.29      |
|                                     | Secondary        | 48  | 17.71      |
| Address                             | Urban            | 145 | 53.51      |
|                                     | Rural            | 126 | 46.49      |
| Nutritional status                  | Normal           | 209 | 77.12      |
|                                     | Underweight      | 30  | 11.07      |
|                                     | Overweight       | 32  | 11.81      |
| Advanced HIV/AIDS                   | Yes              | 46  | 16.97      |
|                                     | No               | 225 | 83.03      |
| Viral suppression                   | Yes              | 221 | 81.55      |
|                                     | No               | 50  | 18.45      |
| Duration on DTG (months)            | ≤ 46             | 141 | 52.03      |
|                                     | >46              | 130 | 47.97      |
| Family history of diabetes mellitus | Yes              | 7   | 2.58       |
|                                     | No               | 264 | 97.42      |
| Testing for blood sugar before DTG  | Yes              | 16  | 5.90       |
|                                     | No               | 255 | 94.10      |
| Diet type (24 recall)- Carbohydrate | Yes              | 232 | 85.61      |
|                                     | No               | 39  | 14.39      |
| Red meat                            | Yes              | 22  | 8.12       |
|                                     | No               | 249 | 91.88      |

<https://doi.org/10.1371/journal.pone.0339268.t001>

was associated with less odds of hyperglycemia with p value <0.2. The factors with p value <0.2 were taken into the multi-variable regression model.

### Factors associated with hyperglycemia in the multivariable analysis

In the multivariable analysis, a child's age > 13 years (AOR: 2.61, 95%CI; 1.4–4.87, p=0.003) and red meat consumption (AOR: 3.52, 95%CI; 1.4–9.0, p=0.00) in the last 24 hours were independently associated with hyperglycemia among HIV infected children on dolutegravir in Kabale district ([Table 3](#)).

### Discussion

In this study we aimed to determine the prevalence and factors associated with hyperglycemia among HIV infected children on dolutegravir in Kabale district in southwest Uganda.

The prevalence of hyperglycemia was (55/271) 20.3%. Of the 55 children with hyperglycemia, 42(76%) were prediabetic and 13(24%) had DM.

A similar prevalence of hyperglycemia was reported in a study of children in Uganda [10]. There is a dearth of literature on prevalence of hyperglycemia among HIV infected children on DTG based regimen. Nonetheless, in an adult study in

**Table 2. Factors associated with hyperglycemia among HIV infected children on DTG in Kabale district (Bivariable analysis).**

| Variable                            | Total N=271 | Hyperglycemia n (%) | No Hyperglycemia n (%) | Crude odds ratio, 95% CI | P value      |
|-------------------------------------|-------------|---------------------|------------------------|--------------------------|--------------|
| Child's age(years)                  |             |                     |                        |                          |              |
| ≤ 13                                | 71          | 22 (40.00)          | 138 (63.89)            | 1                        |              |
| > 13                                | 200         | 33(60.00)           | 78(36.11)              | 2.65(1.45-4.868)         | <b>0.002</b> |
| Gender                              |             |                     |                        |                          |              |
| Male                                | 134         | 23 (41.82)          | 111 (51.39)            | 1                        |              |
| Female                              | 137         | 32(58.18)           | 105(48.61)             | 1.47(0.80-2.67)          | 0.206        |
| Address                             |             |                     |                        |                          |              |
| Rural                               | 126         | 19(34.55)           | 107(49.54)             | 1                        |              |
| Urban                               | 145         | 36(65.45)           | 109(50.46)             | 1.85(1.00-3.44)          | <b>0.048</b> |
| Child's nutritional status          |             |                     |                        |                          |              |
| Overweight                          | 32          | 5(9.09)             | 27 (12.50)             | 0.7(.2565- 1.91)         |              |
| Others                              | 239         | 50 (90.91)          | 189 (87.50)            | 1                        | 0.486        |
| Duration on DTG (months)            |             |                     |                        |                          |              |
| ≤ 46                                | 141         | 26(47.27)           | 115(53.24)             | 1                        |              |
| > 46                                | 130         | 29(52.73)           | 101 (46.76)            | 1.26(0.701-2.29)         | 0.430        |
| Viral suppression                   |             |                     |                        |                          |              |
| Yes                                 | 221         | 43(78.18)           | 178(82.41)             | .764(.3688-1.586)        | 0.472        |
| No                                  | 50          | 12(21.82)           | 38(17.59)              | 1                        |              |
| Family history of Diabetes mellitus |             |                     |                        |                          |              |
| Yes                                 |             | 1(1.8)              | 6(2.8)                 | 0.649(.0138- 5.525)      | 1.0000       |
| No                                  |             | 54(98.2)            | 210(97.2)              | 1                        |              |
| Advanced HIV AIDS                   |             |                     |                        |                          |              |
| Yes                                 | 46          | 11(20.00)           | 35(16.20)              | 1.29(0.608-2.74)         | 0.504        |
| No                                  | 225         | 44(80.00)           | 181(83.80)             | 1                        |              |
| Caregiver's occupation              |             |                     |                        |                          |              |
| Peasant                             | 178         | 30(54.55)           | 148(68.52)             | 0.551(.30-1.0)           | <b>0.053</b> |
| Others                              | 93          | 25(45.45)           | 68(31.48)              | 1                        |              |
| Child's diet (24 recall)            |             |                     |                        |                          |              |
| Carbohydrate                        |             |                     |                        |                          |              |
| Yes                                 | 232         | 45(81.82)           | 187(86.57)             | 0.697(0.317- 1.536)      | 0.372        |
| No                                  | 39          | 10(18.18)           | 29(13.43)              | 1                        |              |
| Red meat                            |             |                     |                        |                          |              |
| Yes                                 | 22          | 10 (18.18)          | 12 (5.56)              | 3.8(1.537-9.28)          | <b>0.004</b> |
| No                                  | 249         | 45(81.82)           | 204(94.44)             | 1                        |              |

<https://doi.org/10.1371/journal.pone.0339268.t002>

Uganda reported a prevalence of 12.8% of hyperglycemia among people living with HIV on dolutegravir based regimen [6]. In addition, Mengistu and colleagues in Ethiopia, reported a lower prevalence compared to ours, which was associated with participant's age [14]. The reasons for the higher prevalences of hyperglycemia in these children compared with the findings from adult studies are not clear.

The prevalence of hyperglycemia in this study was based on Glycated hemoglobin A1c results in combination with random blood sugar tests. HbA1c determines the blood sugar levels in the last 120 days [15]. While, RBS provides a snapshot of the blood glucose, which might under or overestimate the levels. In this study only 6.6% of the cases were

**Table 3. Factors associated with hyperglycemia among HIV infected children on DTG in Kabale District, on multivariable analysis.**

| Variable               | Crude odds ratio, 95%CI | P value | Adjusted odds ratio, 95%CI | P value      |
|------------------------|-------------------------|---------|----------------------------|--------------|
| Child's age(years)     |                         |         |                            |              |
| ≤ 13                   |                         | 1       |                            |              |
| > 13                   | 2.65(1.45 –4.868)       | 0.002   | 2.61(1.399-4.866)          | <b>0.003</b> |
| Address                |                         |         |                            |              |
| Rural                  | 1                       |         |                            |              |
| Urban                  | 1.85(1.00-3.44)         | 0.048   | 1.43(0.76- 2.70)           | 0.269        |
| Caregiver's occupation |                         |         |                            |              |
| Peasant                | 0.551(.30-1.0)          | 0.053   | 0.631(.332-1.20)           | 0.161        |
| Others                 | 1                       |         |                            |              |
| Red meat consumption   |                         |         |                            |              |
| Yes                    | 3.8(1.537-9.28)         | 0.004   | 3.52(1.4-9.0)              | <b>0.009</b> |
| No                     | 1                       |         |                            |              |

<https://doi.org/10.1371/journal.pone.0339268.t003>

diagnosed with random blood sugar. A similar finding was reported by Akello et al., in children living with HIV on DTG based therapy [10].

Dolutegravir interferes with magnesium at the cellular level, causing hypomagnesemia, which results in reduced insulin secretion from the pancreas and resistance at the receptors (GLUT 4) on the target tissues; hence, hyperglycemia [16].

Only 5.9% of the study participants had a known baseline blood sugar before being initiated on dolutegravir based antiretroviral treatment. A risk-based baseline glucose assessment is recommended for patients living with HIV prior initiation on DTG based treatment. However, this is not routinely done for HIV infected children, which creates a concern of whether some of these children might have had undiagnosed prediabetes/diabetes mellitus or it is purely a consequence of DTG combined treatment.

**Factors associated with hyperglycemia:** Child's age above 13 years and red meat consumption were independently associated with hyperglycemia among the HIV infected children on dolutegravir in Kabale district. We did not find studies describing child's age and red meat consumption as predictors of hyperglycemia among HIV infected children on DTG. However, a study by Han et al., 2022, on HIV seronegative children, reported child's age to be significantly associated with hyperglycemia/prediabetes [17]. This might be related with interaction between dolutegravir and hormonal changes during growth spurt at this age that can increase the risk of insulin resistance and hyperglycemia [18].

Red meat consumption was also independently associated with hyperglycemia among HIV infected children on dolutegravir. We found no published study on association between red meat consumption and hyperglycemia among HIV infected children on dolutegravir. However, several studies of non-HIV infected adults, found that consumption of red meat was a significant predictor of prediabetes and type 2 diabetes mellitus [19,20]. The mechanism of red meat consumption and its role in blood glucose metabolism disorders might involve high saturated fat content, heme iron, and nitrates resulting into impaired pancreatic beta cell destruction and insulin resistance [21–23].

Socioeconomic and lifestyle factors might also have a role in hyperglycemia among these children living with HIV on dolutegravir-based treatment. Nonetheless, these were not significant in the multivariable analysis; children in urban residences were more likely to develop hyperglycemia. At the same time, those with peasant caretakers had lower odds of increased blood sugar levels. According to a study in China, 3.3% of children living in urban residences had elevated fasting blood sugar levels [24]. Urbanization is associated with reduced physical activity, overweight and obesity with consequences of metabolic disorders including hyperglycemia [25].



## Limitations

A cross-sectional study design was used which is unable to determine the causal relationship between the outcome and predictor variables. The children were not assessed for anemia, which might underestimate HbA1c results.

## Conclusion

One in every five children living with HIV on dolutegravir in Kabale district, southwestern Uganda, had hyperglycemia and 24% of these had diabetes mellitus. Teenagers and those who had taken red meat in the last 24 hours were more likely to have hyperglycemia. Lifestyle modification and regular blood sugar monitoring should be emphasized in these children.

## Acknowledgments

We thank the study participants (the children and their caregivers), Dr. Gilbert A. Mateeka (DHO Kabale district), and the management of the health facilities involved in the study for given us administrative clearances. We also thank the research assistants who participated in collecting data from the 18 health facilities in Kabale district. We recognize Nakitto Irene Kisakye for her contribution in coordinating the research assistants during data collection.

## Author contributions

**Conceptualization:** Liban Hussein Idow, Timothy Nduhukire, Siyadora Ankunda, Sam Tumwesigire, James K. Tumwine.

**Data curation:** Liban Hussein Idow, Timothy Nduhukire, Siyadora Ankunda, Sam Tumwesigire, Filbert Nyeko, James K. Tumwine.

**Formal analysis:** Liban Hussein Idow, Timothy Nduhukire, Siyadora Ankunda, Sam Tumwesigire, Filbert Nyeko, James K. Tumwine.

**Funding acquisition:** Liban Hussein Idow.

**Methodology:** Liban Hussein Idow, Timothy Nduhukire, Siyadora Ankunda, Sam Tumwesigire, Filbert Nyeko, James K. Tumwine.

**Project administration:** Liban Hussein Idow, Timothy Nduhukire, James K. Tumwine.

**Supervision:** Liban Hussein Idow, Siyadora Ankunda, Sam Tumwesigire, Filbert Nyeko, James K. Tumwine.

**Validation:** Liban Hussein Idow, Sam Tumwesigire, Filbert Nyeko, James K. Tumwine.

**Writing – original draft:** Liban Hussein Idow, Timothy Nduhukire.

**Writing – review & editing:** Liban Hussein Idow, Timothy Nduhukire, Siyadora Ankunda, Sam Tumwesigire, Filbert Nyeko, James K. Tumwine.

## References

1. The urgency of now: AIDS at a crossroads. Geneva: Joint United Nations Programme on HIV/AIDS; 2024 [Internet]. [cited 2025 June 20]. Available from: [https://www.unaids.org/sites/default/files/media\\_asset/2024-unaids-global-aids-update\\_en.pdf](https://www.unaids.org/sites/default/files/media_asset/2024-unaids-global-aids-update_en.pdf)
2. Consolidated guidelines for the prevention and treatment of HIV in Uganda, 2018.
3. Zhao AV, Crutchley RD, Guduru RC, Ton K, Lam T, Min AC. A clinical review of HIV integrase strand transfer inhibitors (INSTIs) for the prevention and treatment of HIV-1 infection. *Retrovirology*. 2022;19(1):22.
4. Hirigo AT, Gutema S, Eifa A, Ketema W. Experience of dolutegravir-based antiretroviral treatment and risks of diabetes mellitus. *SAGE Open Med Case Rep*. 2022;10:2050313X221079444. <https://doi.org/10.1177/2050313X221079444> PMID: [35223037](https://pubmed.ncbi.nlm.nih.gov/35223037/)
5. Gizamba JM, Davies J, Africa C, Choo-Kang C, Goedecke JH, Madlala H, et al. Prevalence of obesity, hypertension and diabetes among people living with HIV in South Africa: a systematic review and meta-analysis. *BMC Infect Dis*. 2023;23(1):861. <https://doi.org/10.1186/s12879-023-08736-5> PMID: [38062372](https://pubmed.ncbi.nlm.nih.gov/38062372/)



6. Byereta LH, Olum R, Mutebi EI, Kalyesubula R, Kagimu M, Meya DB, et al. Prevalence and factors associated with hyperglycemia among persons living with HIV/AIDS on dolutegravir-based antiretroviral therapy in Uganda. *Ther Adv Infect Dis*. 2024;11:20499361241272630. <https://doi.org/10.1177/20499361241272630> PMID: 39286262
7. Namara D, Schwartz JI, Tusubira AK, McFarland W, Birungi C, Semitala FC, et al. The risk of hyperglycemia associated with use of dolutegravir among adults living with HIV in Kampala, Uganda: A case-control study. *Int J STD AIDS*. 2022;33(14):1158–64. <https://doi.org/10.1177/09564624221129410> PMID: 36222490
8. Consolidated guidelines for the prevention and treatment of HIV and aids in Uganda 2022.
9. Available from: <https://www.openepi.com/SampleSize/SSCC.htm>
10. Akello F, Nalwanga D, Musiime V, Kiguli S. Dolutegravir-related hyperglycemia among children and adolescents <18 years in Northern and Eastern Uganda: A cross-sectional study [Internet]. *HIV/AIDS*. 2023 [cited 2025 Jan 28]. Available from: <http://medrxiv.org/lookup/doi/10.1101/2023.12.05.23299497>
11. Sullivan KM, Soe MM. Sample Size for an Unmatched Case-Control Study.
12. [Internet]. [cited 2025 June 19]. Available from: <http://www.openepi.com/>
13. World Health Organization, International Diabetes Federation. Definition and diagnosis of diabetes mellitus and intermediate hyperglycaemia: report of a WHO/IDF consultation. 2006 [cited 2025 Jan 28]; Available from: <https://iris.who.int/handle/10665/43588>
14. Mengistu EF, Aduugna A, Getinet M, Amare GA, Ashenef B, Baye G. Hyperglycemia and its associated factors among people living with HIV on dolutegravir-based antiretroviral therapy in Ethiopia: a cross-sectional study. *Infect Dis*. 2025;12.
15. Sherwani SI, Khan HA, Ekhzaimy A, Masood A, Sakharkar MK. Significance of HbA1c Test in Diagnosis and Prognosis of Diabetic Patients. *Bio-mark Insights*. 2016;11:95–104. <https://doi.org/10.4137/BMI.S38440> PMID: 27398023
16. McLaughlin M, Walsh S, Galvin S. Dolutegravir-induced hyperglycaemia in a patient living with HIV. *J Antimicrob Chemother*. 2018;73(1):258–60.
17. Han C, Song Q, Ren Y, Chen X, Jiang X, Hu D. Global prevalence of prediabetes in children and adolescents: A systematic review and meta-analysis. *J Diabetes*. 2022;14(7):434–41. <https://doi.org/10.1111/1753-0407.13291> PMID: 35790502
18. Musa AZ, Umar UI, Obiagwu PN, Ibrahim M. Prediabetes in children and adolescents: a narrative review. *Ann Afr Med Res*. 2024.
19. Nguyen CQ, Pham TTP, Fukunaga A, Hoang DV, Phan TV, Phan DC, et al. Red meat consumption is associated with prediabetes and diabetes in rural Vietnam: a cross-sectional study. *Public Health Nutr*. 2023;26(5):1006–13. <https://doi.org/10.1017/S1368980022001422> PMID: 35722988
20. Gu X, Drouin-Chartier J-P, Sacks FM, Hu FB, Rosner B, Willett WC. Red meat intake and risk of type 2 diabetes in a prospective cohort study of United States females and males. *Am J Clin Nutr*. 2023;118(6):1153–63. <https://doi.org/10.1016/j.ajcnut.2023.08.021> PMID: 38044023
21. Sobieska K, Buczyńska A, Krętowski AJ, Popławska-Kita A. Iron homeostasis and insulin sensitivity: unraveling the complex interactions. *Rev Endocr Metab Disord*. 2024;25(5):925–39. <https://doi.org/10.1007/s11554-024-09908-7> PMID: 39287729
22. Qin Y, Huang Y, Li Y, Qin L, Wei Q, Chen X. Association between systemic iron status and  $\beta$ -cell function and insulin sensitivity in patients with newly diagnosed type 2 diabetes. *Frontiers in Endocrinology*. 2023;14:1143919. <https://doi.org/10.3389/fendo.2023.1143919>
23. Blake S, Rudolph D. How excess dietary saturated fats induce insulin resistance. *Int J Transl Sci*. 2021:1–4.
24. Huang F, Lin Z, Lu Y, Zhou Y, Zhu L, Wang X, et al. The Prevalence and Associated Factors of Impaired Fasting Glucose among Children and Adolescents in Urban China: A Large-Scale Cross-Sectional Study. *Pediatr Diabetes*. 2024;2024:6701192. <https://doi.org/10.1155/2024/6701192> PMID: 40302960
25. Boakye K, Bovbjerg M, Schuna J Jr, Branscum A, Varma RP, Ismail R, et al. Urbanization and physical activity in the global Prospective Urban and Rural Epidemiology study. *Sci Rep*. 2023;13(1):290. <https://doi.org/10.1038/s41598-022-26406-5> PMID: 36609613
